# Supplementary material for: Attractant and repellent cues cooperate in guiding a subset of olfactory sensory axons to a well-defined protoglomerular target
Source: Oxford University Press journal article supplement (doi:10.1242/dev.127985), 2016-01-01
Supplement: dev127985supp.pdf [file dev127985supp.pdf]

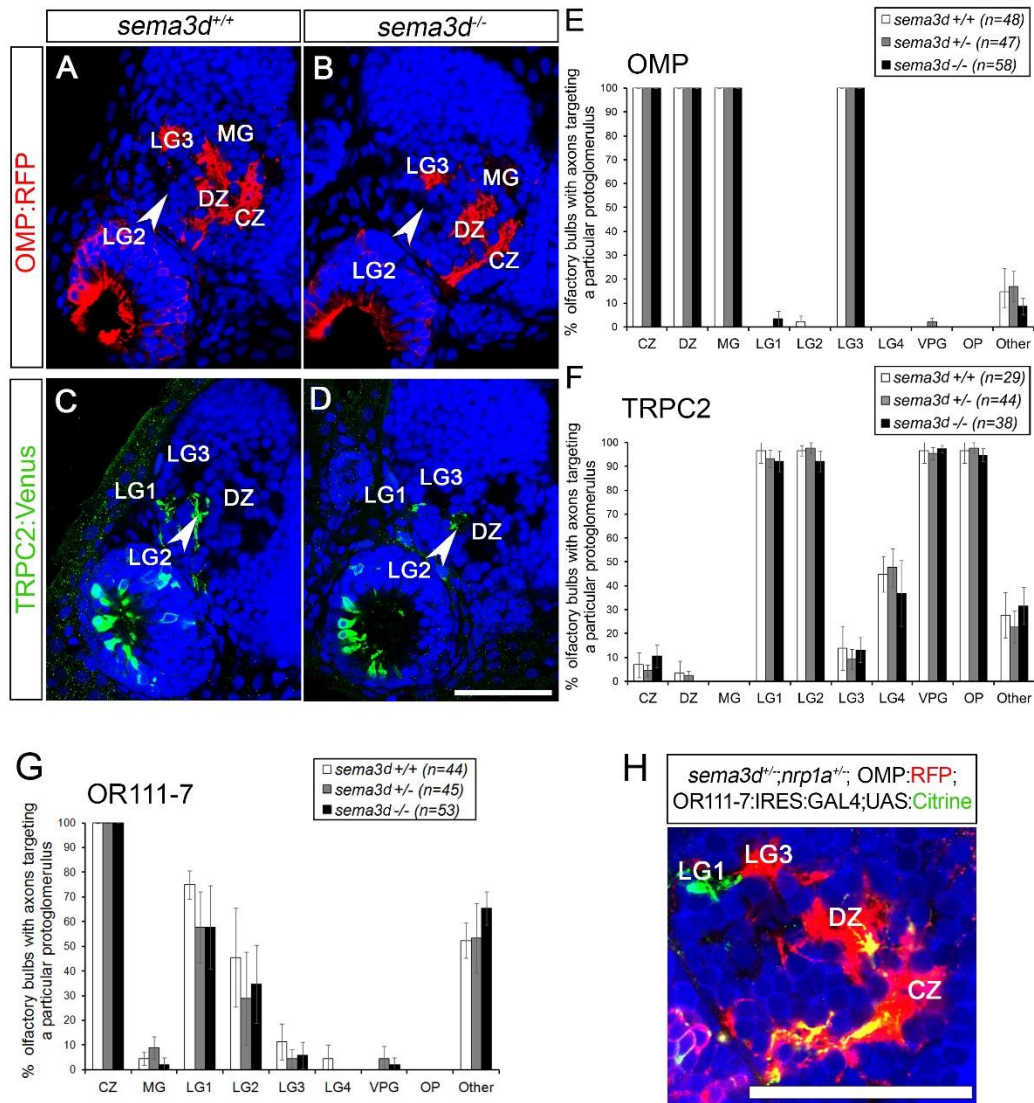

**Fig. S1. Sensory neurons expressing Omp or Trpc2 have no detectable targeting errors in *sema3d* mutants.** *A-B*, Single optical sections through 72 hpf *omp*:RFP larvae (frontal view). Axons shown in red. Dorsal is up and medial is to the right of the image. *C-D*, Single optical sections through 72hpf *trpc2*:Venus larvae (frontal view). Axons shown in green. Propidium iodide (blue) labels cell bodies revealing protoglomeruli as cell-free regions. Scale bar (in *D*): *A-D*, 50µm. *E-G*, The percentage of olfactory bulbs displaying a projection to a particular protoglomerulus or non-protoglomerular regions (other) are shown. Homozygous *sema3d* mutants (black bars) are compared to heterozygous (grey bars) and wild-type (white bars) siblings. Statistical significance was estimated using two-tailed Fisher's exact test ( $p < 0.05^*$ ,  $p < 0.01^{**}$ ,  $p < 0.001^{***}$ ). Error bars represent SE of the sample proportion. *A, B, E*, Omp positive axons project to the same protoglomeruli in *sema3d* mutants as in controls. *C, D, F*, The *Trpc2*:Venus projection is unaltered in *sema3d* mutants. *G*, OR111-7 transgene-expressing axons do not display an increase in projections to the listed protoglomeruli or to non-protoglomerular regions. *H*, single optical section through a 72 hpf *sema3d*<sup>+/-</sup>; *nrp1a*<sup>+/-</sup>; *omp*:RFP; OR111-7:IRES:GAL4;UAS:Citrine larva. The ectopic projection to DZ in *sema3d*<sup>+/-</sup>; *nrp1a*<sup>+/-</sup>; *omp*:RFP; OR111-7:IRES:GAL4;UAS:Citrine larvae is Omp positive. Scale bar (in *H*): *H*, 50µm. CZ, central zone; DZ, dorsal zone; MG, medial protoglomeruli; LG1, lateral protoglomerulus 1; LG2, lateral protoglomerulus 2, LG3, lateral protoglomerulus 3.

**Table S1. The localization of class 3 semaphorins in the anterior and posterior regions of the 36 hpf olfactory bulb.**

| Semaphorin     | Localization at 36 hpf                                              |                                  |
|----------------|---------------------------------------------------------------------|----------------------------------|
|                | Anterior OB                                                         | Posterior OB                     |
| <i>sema3aa</i> | dorsomedial, lateral, central                                       | dorsomedial                      |
| <i>sema3sb</i> | broad dorsal expression                                             | broad dorsal expression, lateral |
| <i>sema3b</i>  | Not tested                                                          | Not tested                       |
| <i>sema3bl</i> | Not tested                                                          | Not tested                       |
| <i>sema3c</i>  | Not tested                                                          | Not tested                       |
| <i>sema3d</i>  | Along the dorsal ventral axis, strong ventral and medial expression | undetected                       |
| <i>sema3e</i>  | medial, ventral                                                     | undetected                       |
| <i>sema3fa</i> | anterior, spans dorsal and ventral bulb                             | undetected                       |
| <i>sema3fb</i> | dorsomedial                                                         | dorsomedial                      |
| <i>sema3ga</i> | lateral                                                             | dorsal                           |
| <i>sema3gb</i> | Not tested                                                          | Not tested                       |
| <i>sema3h</i>  | throughout the bulb                                                 | throughout the bulb              |
